# Supplementary material for: A2BiI5O15(A = K+or Rb+): two new promising nonlinear optical materials containing [I3O9]3−bridging anionic groups
Source: Royal Society of Chemistry journal article supplement (doi:10.1039/c4tc00264d), 2014-01-01
Supplement: c4tc00264d.pdf [file c4tc00264d.pdf]

## Electronic Supplementary Information

### **$A_2BiI_5O_{15}$ (A= $K^+$ or $Rb^+$ ): Two New Promising Nonlinear Optical Materials Containing $[I_3O_9]^{3-}$ Bridging Anionic Group †**

*Yin Huang<sup>a</sup>, Xianggao Meng<sup>b</sup>, Pifu Gong<sup>c</sup>, Lei Yang,<sup>c</sup> Zheshuai Lin<sup>c</sup> Xingguo Chen<sup>a</sup> and Jingui Qin<sup>\*a</sup>*

<sup>a</sup> Department of Chemistry, Wuhan University, Wuhan 430072, China,

<sup>b</sup> College of Chemistry, Central China Normal University, Wuhan 430079, China

<sup>c</sup> Beijing Center for Crystal R&D, Technical Institute of Physics and Chemistry, Chinese Academy of Sciences, Beijing 100190, China

- 1. XRD and EDX of  $K_2BiI_5O_{15}$  and  $Rb_2BiI_5O_{15}$ .**
- 2. ATR-FTIR Spectra of  $K_2BiI_5O_{15}$  and  $Rb_2BiI_5O_{15}$ .**
- 3. Theoretical Computations.**
- 4. Thermal properties of  $K_2BiI_5O_{15}$  and  $Rb_2BiI_5O_{15}$**

**Figure S1.** Calculated and experimental powder XRD patterns of  $K_2BiI_5O_{15}$ .

**Figure S2.** EDX of  $K_2BiI_5O_{15}$ .

**Figure S3.** Calculated and experimental powder XRD patterns of  $Rb_2BiI_5O_{15}$ .

**Figure S4.** EDX of  $Rb_2BiI_5O_{15}$ .

**Figure S5.** The coordination structure of K atoms in  $K_2BiI_5O_{15}$ .

**Figure S6.** The coordination structure of Bi and I atoms in  $K_2BiI_5O_{15}$ .

**Figure S7.** The ATR-FTIR spectrum of  $K_2BiI_5O_{15}$ .

**Figure S8.** The ATR-FTIR spectrum of  $\text{Rb}_2\text{BiI}_5\text{O}_{15}$ .

**Figure S9.** Electronic band structure of  $\text{K}_2\text{BiI}_5\text{O}_{15}$  (a) and  $\text{Rb}_2\text{BiI}_5\text{O}_{15}$  (b).

**Figure S10.** DOS and PDOS plots of  $\text{K}_2\text{BiI}_5\text{O}_{15}$  (a) and  $\text{Rb}_2\text{BiI}_5\text{O}_{15}$  (b).

**Figure S11.** TGA curve of  $\text{K}_2\text{BiI}_5\text{O}_{15}$ .

**Figure S12.** TGA curve of  $\text{Rb}_2\text{BiI}_5\text{O}_{15}$ .

**Table S1.** Selected Bond Distances ( $\text{\AA}$ ) for  $\text{K}_2\text{BiI}_5\text{O}_{15}$ .

**Table S2.** Selected Bond Distances ( $\text{\AA}$ ) for  $\text{Rb}_2\text{BiI}_5\text{O}_{15}$ .

## 1. XRD and EDX of $\text{K}_2\text{BiI}_5\text{O}_{15}$ and $\text{Rb}_2\text{BiI}_5\text{O}_{15}$ .

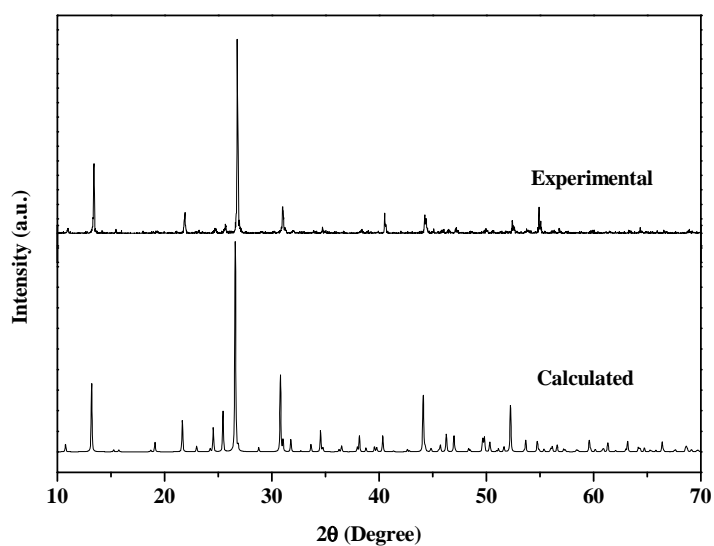

**Figure S1.** Calculated and experimental powder XRD patterns of  $\text{K}_2\text{BiI}_5\text{O}_{15}$ .

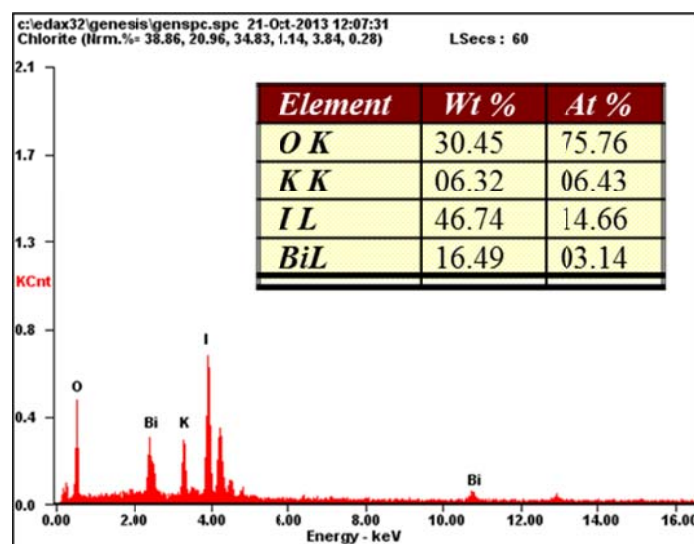

Figure S2. EDX of  $K_2Bi_5O_{15}$ .

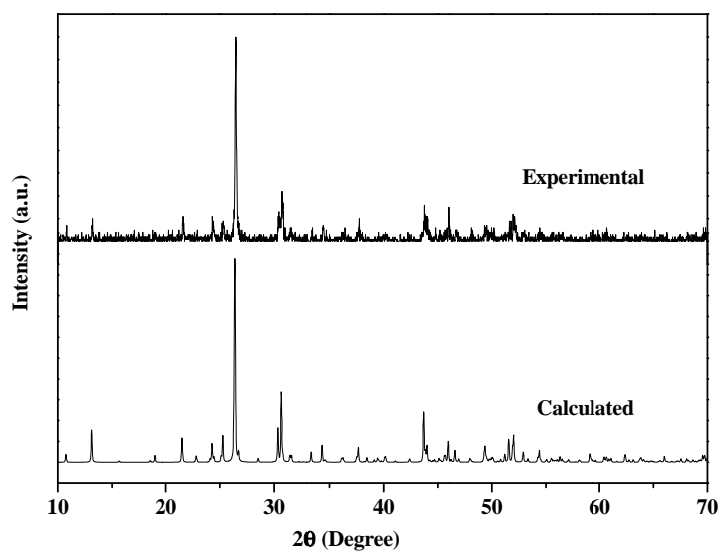

Figure S3. Calculated and experimental powder XRD patterns of  $Rb_2Bi_5O_{15}$ .

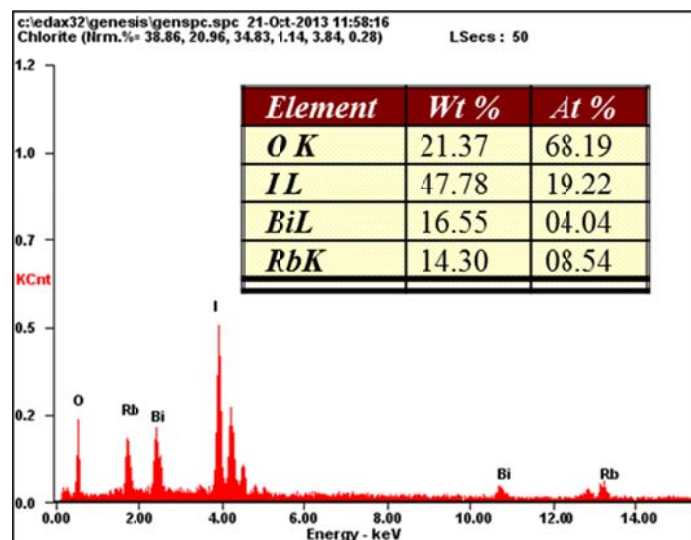

Figure S4. EDX of  $\text{Rb}_2\text{Bi}_5\text{O}_{15}$ .

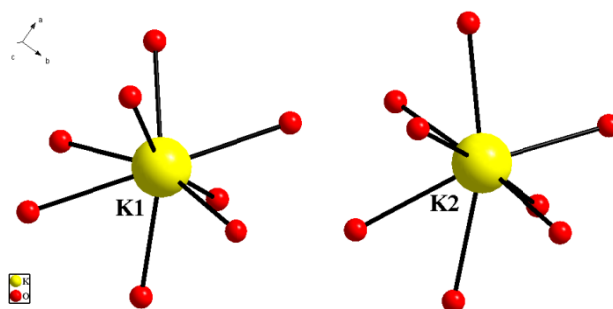

Figure S5. The coordination structure of K atoms in  $\text{K}_2\text{Bi}_5\text{O}_{15}$ .

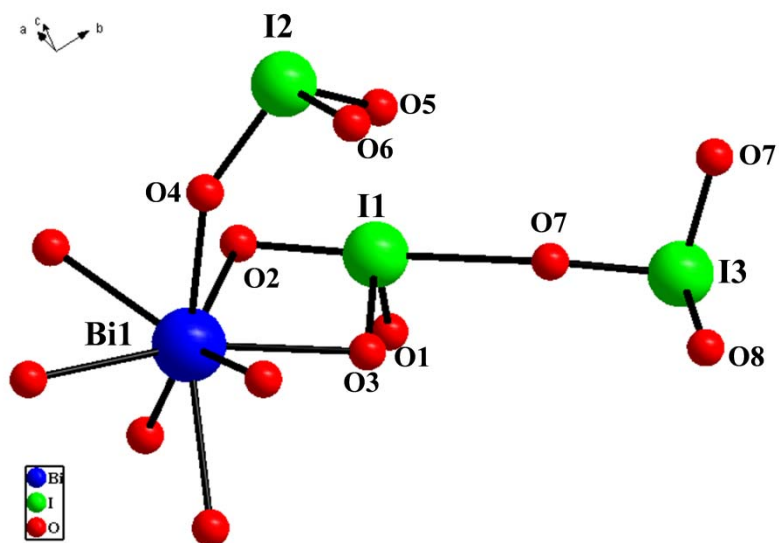

Figure S6. The coordination structure of Bi and I atoms in  $\text{K}_2\text{Bi}_5\text{O}_{15}$ .

## 2. ATR-FTIR Spectra of $\text{K}_2\text{BiI}_5\text{O}_{15}$ and $\text{Rb}_2\text{BiI}_5\text{O}_{15}$ .

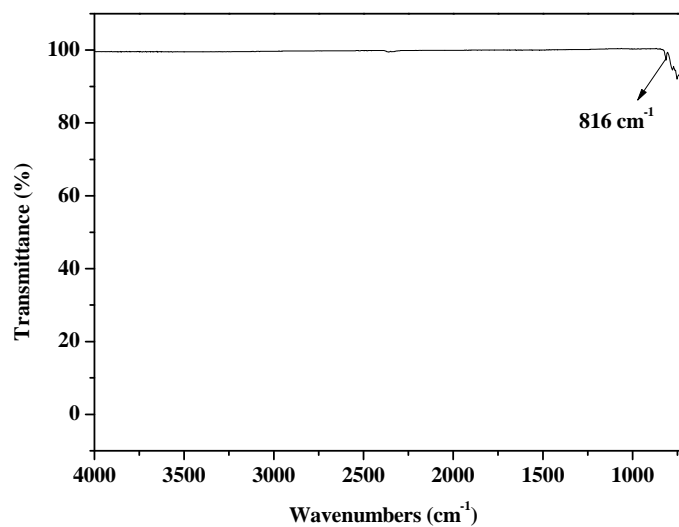

**Figure S7.** The ATR-FTIR spectrum of  $\text{K}_2\text{BiI}_5\text{O}_{15}$ .

3.

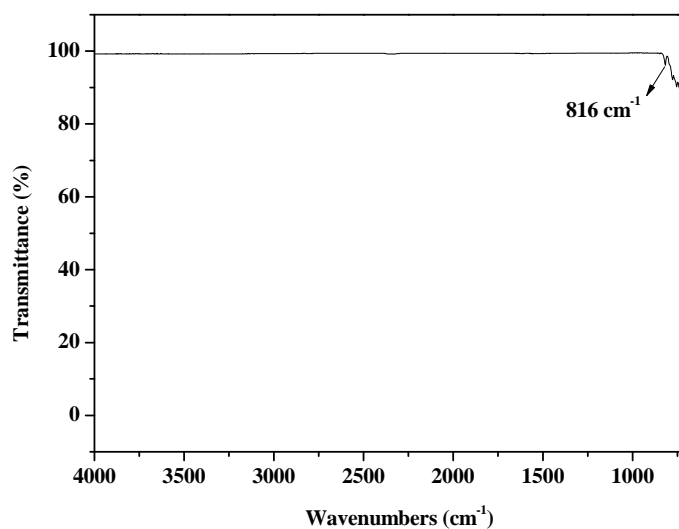

**Figure S8.** The ATR-FTIR spectrum of  $\text{Rb}_2\text{BiI}_5\text{O}_{15}$ .

## 3. Theoretical Computations.

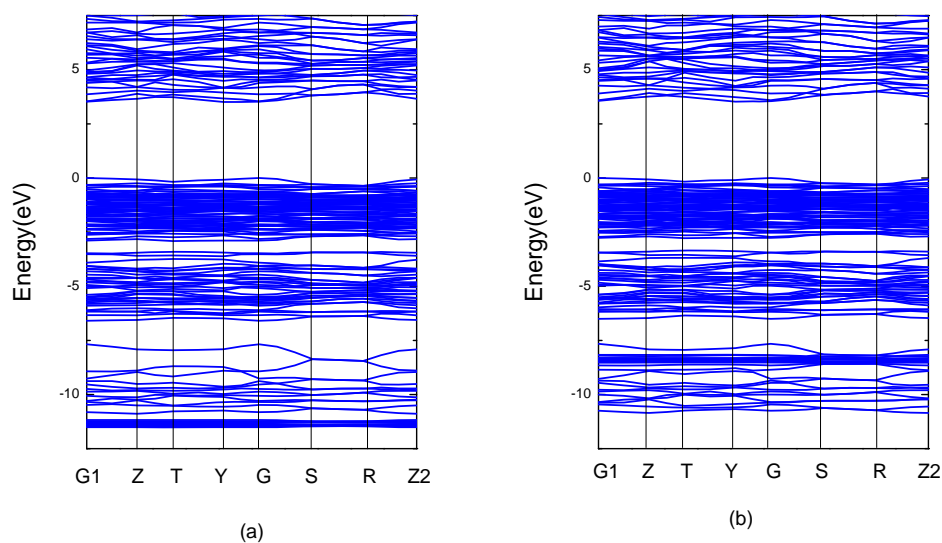

**Figure S9.** Electronic band structure of  $\text{K}_2\text{BiI}_5\text{O}_{15}$  (a) and  $\text{Rb}_2\text{BiI}_5\text{O}_{15}$  (b) crystals along the lines of high symmetry points in the Brillouin zone.

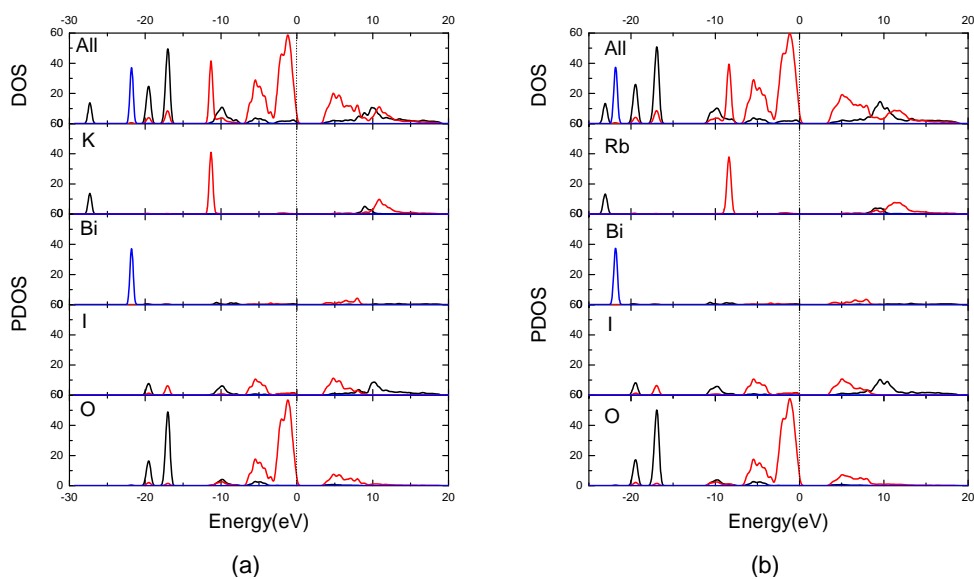

**Figure S10.** DOS and PDOS plots of  $\text{K}_2\text{BiI}_5\text{O}_{15}$  (a) and  $\text{Rb}_2\text{BiI}_5\text{O}_{15}$  (b). The *s*, *p* and *d* orbitals are represented by black, red and blue curves, respectively. The VB maximum is indicated by the dotted straight line.

#### 4. Thermal properties of $\text{K}_2\text{BiI}_5\text{O}_{15}$ and $\text{Rb}_2\text{BiI}_5\text{O}_{15}$

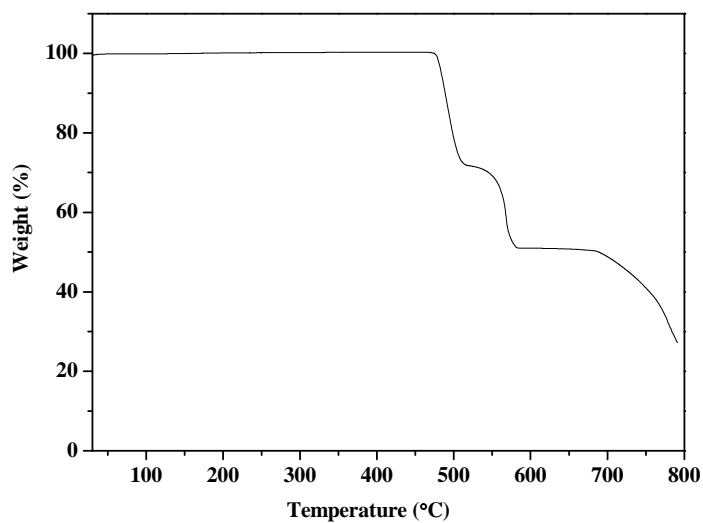

**Figure S11.** TGA curve of  $\text{K}_2\text{BiI}_5\text{O}_{15}$ .

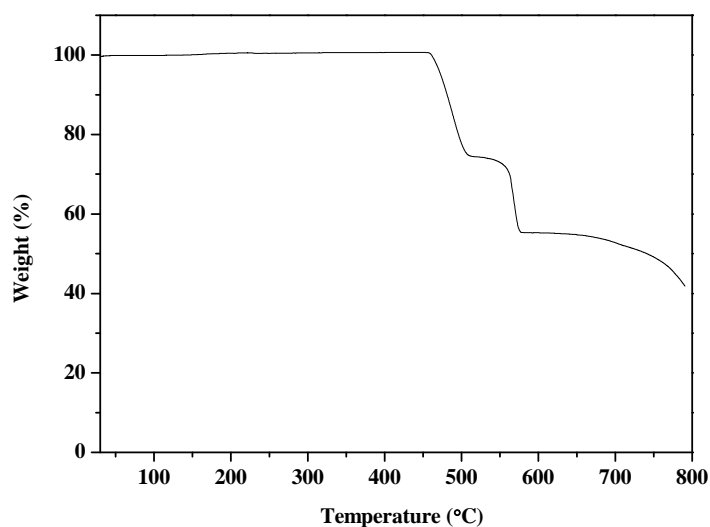

**Figure S12.** TGA curve of  $\text{Rb}_2\text{BiI}_5\text{O}_{15}$ .

**Table S1.** Selected Bond Distances (Å) for  $\text{K}_2\text{BiI}_5\text{O}_{15}$ .

| Bond         | Bond distances | Bond        | Bond distances |
|--------------|----------------|-------------|----------------|
| Bi(1)-O(4)#1 | 2.352(5)       | K(1)-O(1)#8 | 2.734(5)       |
| Bi(1)-O(4)   | 2.352(5)       | K(1)-O(1)   | 2.817(5)       |
| Bi(1)-O(2)#1 | 2.399(4)       | K(1)-O(1)#9 | 2.817(5)       |
| Bi(1)-O(2)   | 2.400(4)       | K(1)-O(4)#1 | 3.040(5)       |

|              |          |              |          |
|--------------|----------|--------------|----------|
| Bi(1)-O(3)   | 2.491(4) | K(1)-O(4)#10 | 3.040(5) |
| Bi(1)-O(3)#1 | 2.491(4) | K(1)-O(3)#9  | 3.127(5) |
| Bi(1)-O(2)#2 | 2.549(4) | K(1)-O(3)    | 3.127(5) |
| Bi(1)-O(2)#3 | 2.549(4) | K(2)-O(5)#3  | 2.839(5) |
| I(1)-O(1)    | 1.797(4) | K(2)-O(5)#11 | 2.839(5) |
| I(1)-O(3)    | 1.829(5) | K(2)-O(5)    | 2.896(6) |
| I(1)-O(2)    | 1.865(4) | K(2)-O(5)#7  | 2.896(6) |
| I(1)-O(7)    | 2.457(5) | K(2)-O(6)    | 3.067(6) |
| I(2)-O(6)    | 1.803(5) | K(2)-O(6)#7  | 3.067(6) |
| I(2)-O(5)    | 1.808(4) | K(2)-O(7)    | 3.108(6) |
| I(2)-O(4)    | 1.822(5) | K(2)-O(7)#7  | 3.108(6) |
| I(3)-O(7)#7  | 1.790(5) | O(1)-K(1)#5  | 2.734(5) |
| I(3)-O(7)    | 1.790(5) | O(2)-Bi(1)#5 | 2.549(4) |
| I(3)-O(8)    | 1.815(7) | O(4)-K(1)#4  | 3.040(5) |
| K(1)-O(1)#2  | 2.734(5) | O(5)-K(2)#6  | 2.839(5) |

Symmetry transformations used to generate equivalent atoms:

#1 -x+1,-y,z    #2 x,-y+0,z-1/2    #3 -x+1,y+0,z-1/2    #4 x+1,y,z  
 #5 x,-y+0,z+1/2    #6 -x+1,-y+1/2,z+1/2    #7 x,-y+1/2,z    #8 -x,y+0,z-1/2  
 #9 -x,-y,z    #10 x-1,y,z    #11 -x+1,-y+1/2,z-1/2

**Table S2.** Selected Bond Distances (Å) for Rb<sub>2</sub>BiI<sub>5</sub>O<sub>15</sub>.

| Bond         | Bond distances | Bond          | Bond distances |
|--------------|----------------|---------------|----------------|
| Bi(1)-O(2)   | 2.368(9)       | Rb(1)-O(1)#9  | 2.917(9)       |
| Bi(1)-O(2)#1 | 2.368(9)       | Rb(1)-O(1)    | 2.917(9)       |
| Bi(1)-O(4)#1 | 2.371(9)       | Rb(1)-O(4)#1  | 3.050(10)      |
| Bi(1)-O(4)   | 2.371(9)       | Rb(1)-O(4)#10 | 3.050(10)      |
| Bi(1)-O(3)#1 | 2.503(8)       | Rb(1)-O(3)#9  | 3.235(9)       |
| Bi(1)-O(3)   | 2.504(8)       | Rb(1)-O(3)    | 3.235(9)       |
| Bi(1)-O(2)#2 | 2.631(9)       | Rb(1)-O(2)#8  | 3.589(9)       |
| Bi(1)-O(2)#3 | 2.631(9)       | Rb(1)-O(2)#2  | 3.589(9)       |
| I(1)-O(1)    | 1.799(8)       | Rb(2)-O(5)#3  | 2.903(10)      |
| I(1)-O(3)    | 1.832(10)      | Rb(2)-O(5)#11 | 2.903(10)      |
| I(1)-O(2)    | 1.865(8)       | Rb(2)-O(5)#7  | 3.019(11)      |
| I(1)-O(7)    | 2.452(13)      | Rb(2)-O(5)    | 3.019(11)      |
| I(2)-O(6)    | 1.800(11)      | Rb(2)-O(6)#7  | 3.133(11)      |
| I(2)-O(5)    | 1.801(8)       | Rb(2)-O(6)    | 3.133(11)      |
| I(2)-O(4)    | 1.825(9)       | Rb(2)-O(7)    | 3.186(14)      |



---

|              |           |              |           |
|--------------|-----------|--------------|-----------|
| I(3)-O(7)    | 1.799(12) | Rb(2)-O(7)#7 | 3.186(14) |
| I(3)-O(7)#7  | 1.799(12) | O(1)-Rb(1)#5 | 2.822(10) |
| I(3)-O(8)    | 1.82(2)   | O(2)-Bi(1)#5 | 2.631(9)  |
| Rb(1)-O(1)#2 | 2.822(10) | O(4)-Rb(1)#4 | 3.050(10) |
| Rb(1)-O(1)#8 | 2.822(10) | O(5)-Rb(2)#6 | 2.903(10) |

---

Symmetry transformations used to generate equivalent atoms:

#1  $-x+1,-y,z$     #2  $x,-y+0,z-1/2$     #3  $-x+1,y+0,z-1/2$     #4  $x+1,y,z$   
#5  $x,-y+0,z+1/2$     #6  $-x+1,-y+1/2,z+1/2$     #7  $x,-y+1/2,z$     #8  $-x,y+0,z-1/2$   
#9  $-x,-y,z$     #10  $x-1,y,z$     #11  $-x+1,-y+1/2,z-1/2$
